# Supplementary material for: Lung Micrometastases Display ECM Depletion and Softening While Macrometastases Are 30-Fold Stiffer and Enriched in Fibronectin
Source: MDPI journal article supplement (doi:10.3390/cancers15082404), 2023-04-21
Supplement: s1 [file s1]

# SUPPLEMENTARY MATERIAL

*“Lung Micrometastases Display ECM Depletion and Softening While Macrometastases Are 30-Fold Stiffer and Enriched in Fibronectin”*

## Supplementary Figures and Figure legends

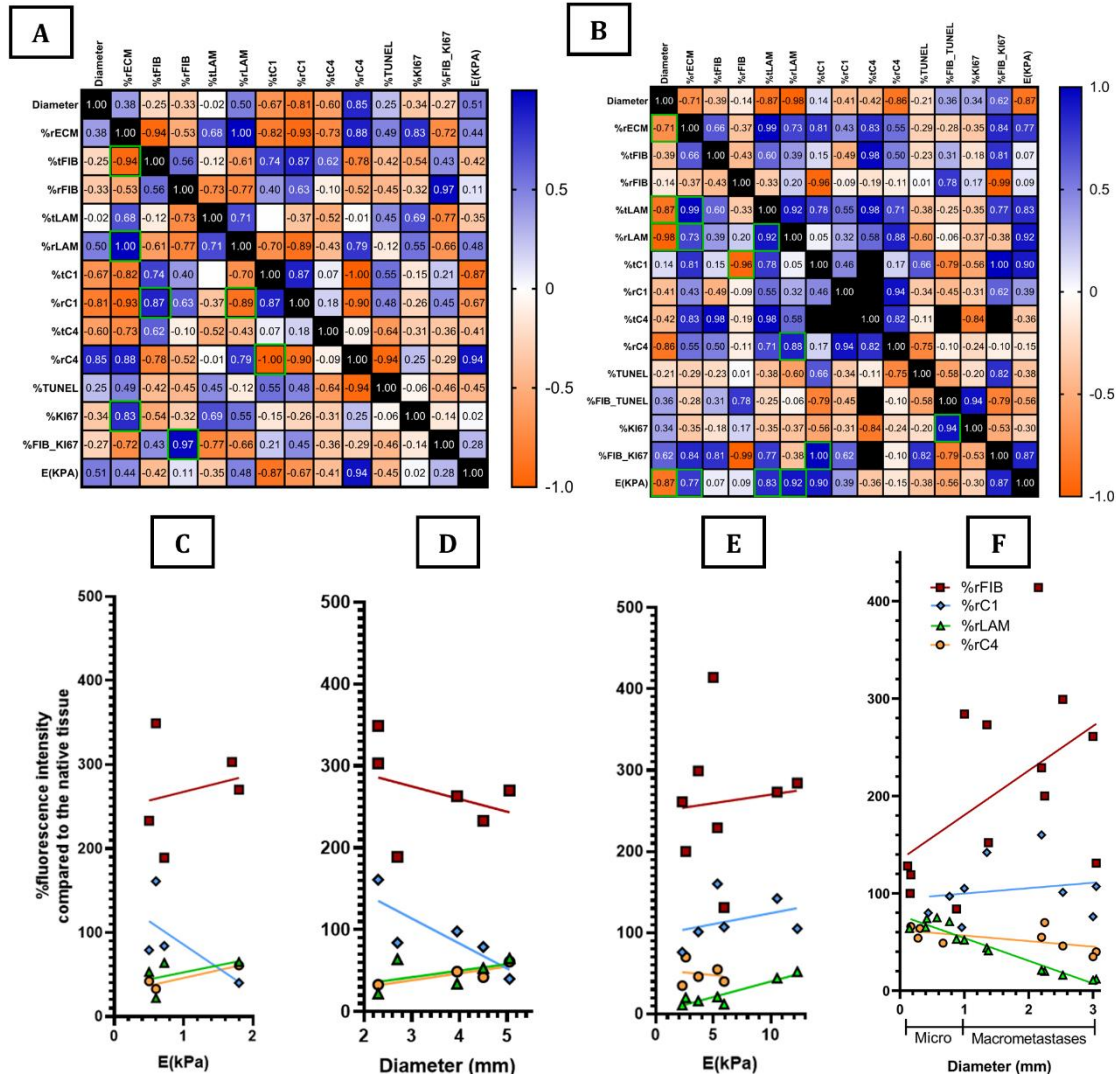

**Supplementary Figure S1** - Correlation analysis between all measured variables in CAR and MEL metastases. (A-B) Pearson correlation matrix with Pearson correlation coefficients for CAR and MEL metastases, respectively. Green boxes indicate statistically significant correlations ( $p < 0.05$ ). Relationship between ECM proteins (fibronectin, laminin, collagen I and IV) and (C) stiffness in CAR; (D) diameter in CAR; (E) stiffness in MEL and (F) diameter in MEL micro and macro metastases. Only significant and/or biologically relevant correlations were plotted.

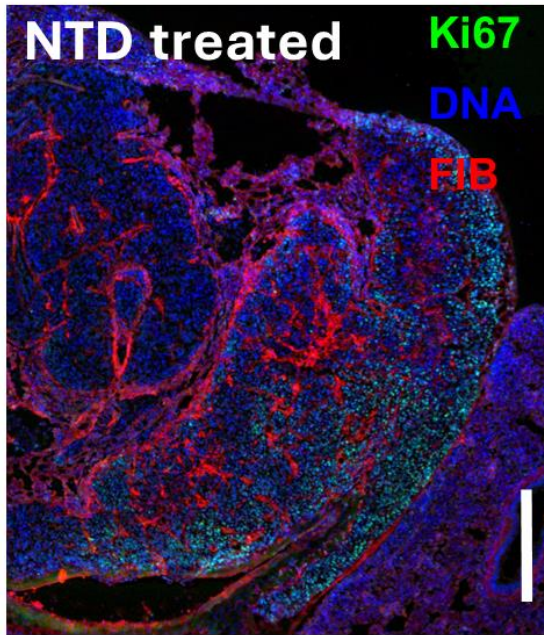

**Supplementary Figure S2** – Representative image of tumor proliferation (Ki67) and fibronectin in MEL macrometastasis after NTD treatment. In blue, DNA staining (Nucblue), in green Ki67+ areas and in red, fibronectin. Scale bar = 400  $\mu$ m.

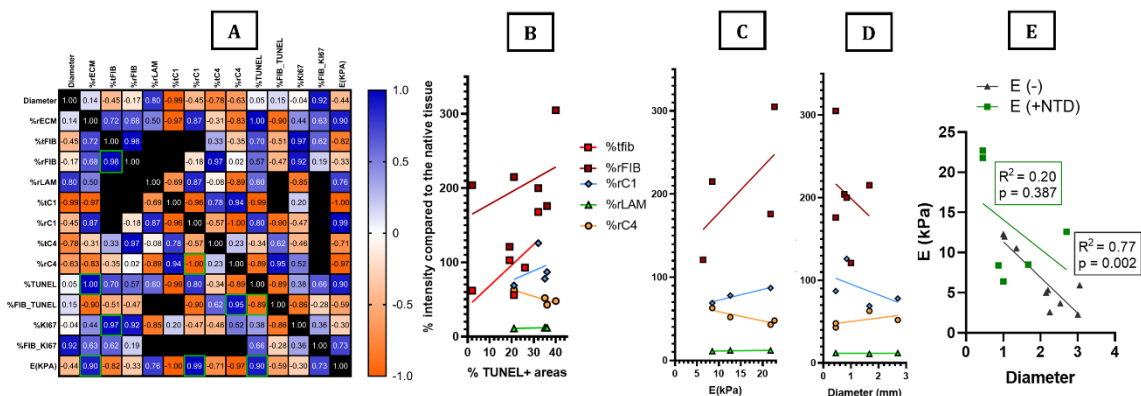

**Supplementary Figure S3** - Correlation analysis between all measured variables in NTD-treated MEL metastases. (A) Pearson correlation matrix with Pearson correlation coefficients for NTD-treated MEL metastases. Green boxes indicate statistically significant correlations ( $p < 0.05$ ). Relationship between ECM proteins (fibronectin, laminin, collagen I and IV) and (B) tumor necrosis, measured by TUNEL+ areas; (C) ECM stiffness and (D) macrometastases' diameter. Correlation analysis in MEL (treated (-) and non-treated (+)) between stiffness of the ECM-rich areas and (E) macrometastases diameter. P-values ( $p$ ) obtained by computing the pearson correlation. Only significant and/or biologically relevant correlations were plotted.
